# Supplementary material for: Coumarin N-Acylhydrazone Derivatives: Green Synthesis and Antioxidant Potential—Experimental and Theoretical Study
Source: MDPI journal article supplement (doi:10.3390/antiox12101858), 2023-10-13
Supplement: s1 [file s1]

## Supplementary Material

### Coumarin N-acylhydrazone derivatives: green synthesis and antioxidant potential - experimental and theoretical study

Dušica M. Simijonović<sup>1</sup>, Dejan A. Milenković<sup>1,\*</sup>, Edina H. Avdović<sup>1</sup>, Žiko B. Milanović<sup>1</sup>, Marko R. Antonijević<sup>1</sup>, Ana D. Amić<sup>2</sup>, Zana Dolićanin<sup>3</sup>, and Zoran S. Marković<sup>1,4,\*</sup>

<sup>1</sup>Department of Science, Institute for Information Technologies, University of Kragujevac, Jovana Cvijića bb, 34000 Kragujevac, Serbia

<sup>2</sup>Department of Chemistry, Josip Juraj Strossmayer University of Osijek, Ulica Cara Hadrijana 8A, 31000 Osijek, Croatia

<sup>3</sup>Department of Biomedical Sciences, State University of Novi Pazar, Vuka Karadžića bb, 36300 Novi Pazar, Serbia

<sup>3</sup>Department of Natural Science and Mathematics, State University of Novi Pazar, Vuka Karadžića bb, 36300 Novi Pazar, Serbia

\*Correspondence: zmarkovic@uni.kg.ac.rs; dejanm@uni.kg.ac.rs

#### Contents

|                                                                                                                                                                                |    |
|--------------------------------------------------------------------------------------------------------------------------------------------------------------------------------|----|
| <sup>1</sup> H NMR and <sup>13</sup> C NMR spectra of products <b>3a-f</b> .....                                                                                               | 2  |
| <sup>1</sup> H NMR and <sup>13</sup> CNMR spectra of <b>3a</b> .....                                                                                                           | 2  |
| <sup>1</sup> H NMR and <sup>13</sup> CNMR spectra of <b>3b</b> .....                                                                                                           | 3  |
| <sup>1</sup> H NMR and <sup>13</sup> CNMR spectra of <b>3c</b> .....                                                                                                           | 4  |
| <sup>1</sup> H NMR and <sup>13</sup> CNMR spectra of <b>3d</b> .....                                                                                                           | 5  |
| <sup>1</sup> H NMR and <sup>13</sup> CNMR spectra of <b>3e</b> .....                                                                                                           | 6  |
| <sup>1</sup> H NMR and <sup>13</sup> CNMR spectra of <b>3f</b> .....                                                                                                           | 7  |
| UV-Vis spectra of products <b>3a-f</b> .....                                                                                                                                   | 8  |
| Figure S1. NBO spin distribution for formed O-centered radical species .....                                                                                                   | 9  |
| Figure S2. NBO spin distribution for formed N-centered radical species .....                                                                                                   | 10 |
| Figure S3. NBO charge distribution for formed O-centered anionic species .....                                                                                                 | 11 |
| Figure S4. NBO charge distribution for formed N-centered anionic species .....                                                                                                 | 12 |
| Figure S5. Optimized geometry of radical, neutral and anionic DPPH species at M06-2X/6-311++G(d,p) level of theory in methanol (SMD solvation model) .....                     | 12 |
| Figure S6. Optimized geometry of radical cation, neutral and cation ABTS species at M06-2X/6-311++G(d,p) level of theory in methanol (SMD solvation model) .....               | 13 |
| Table S1. DPPH scavenging activity of products <b>3c</b> and <b>3d</b> , as well as referent compounds at concentrations close to the IC <sub>50</sub> value .....             | 14 |
| Table S2. ABTS radical cation scavenging activity of products <b>3c</b> , <b>3d</b> , and referent compound Trolox at concentrations close to the IC <sub>50</sub> value ..... | 14 |

$^1\text{H}$  NMR and  $^{13}\text{C}$  NMR spectra of products **3a-f**

$^1\text{H}$  NMR and  $^{13}\text{C}$  NMR spectra of compound **3a**

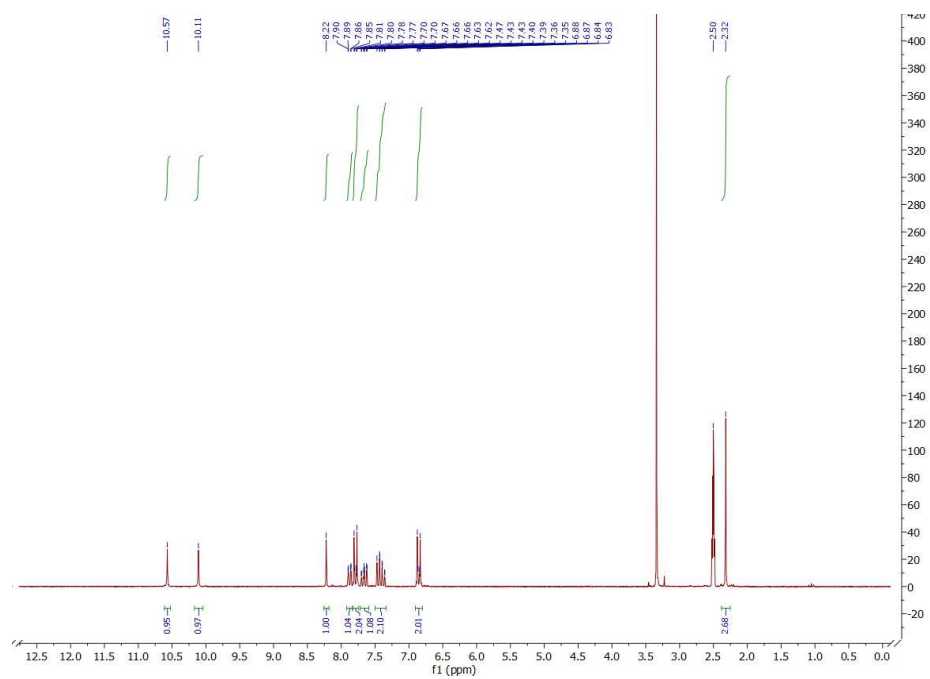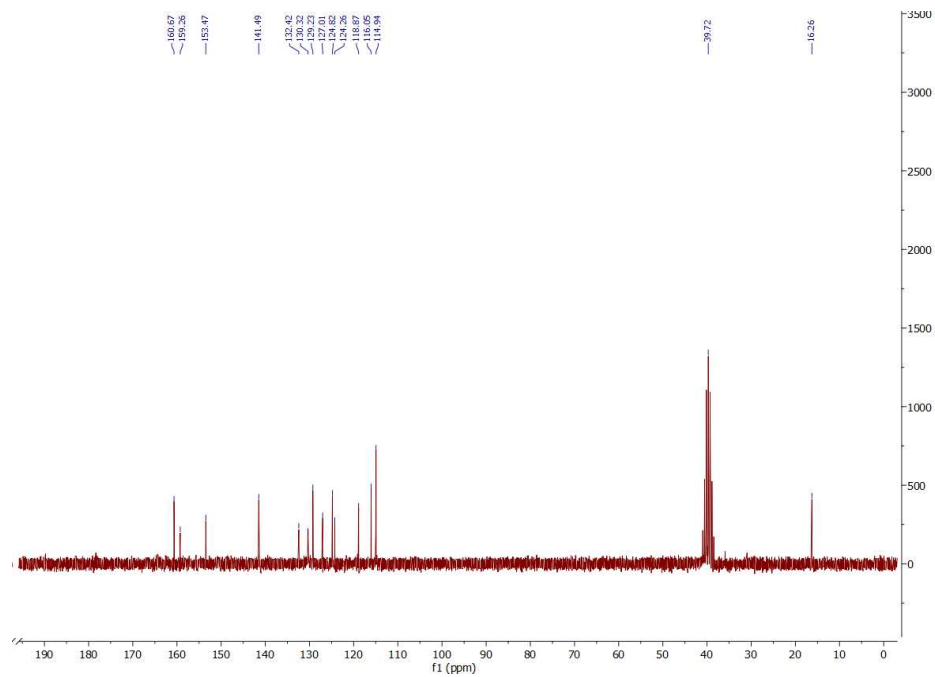

$^1\text{H}$  NMR and  $^{13}\text{C}$  NMR spectra of compound **3b**

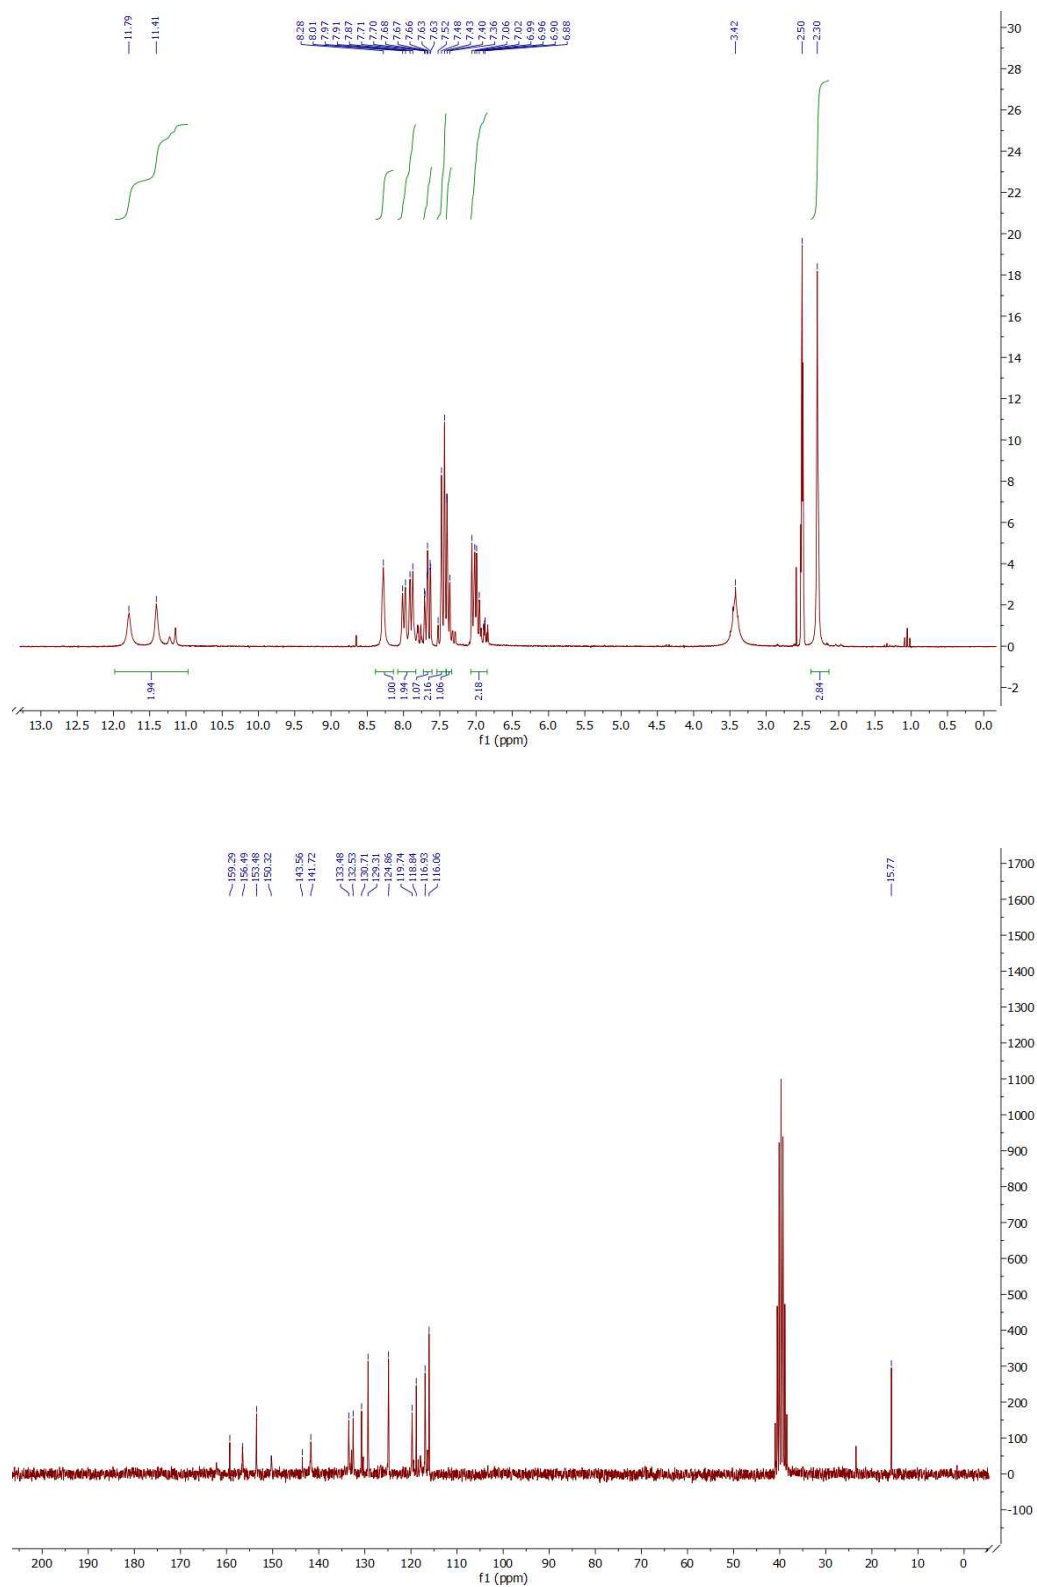

$^1\text{H}$  NMR and  $^{13}\text{C}$  NMR spectra of compound **3c**

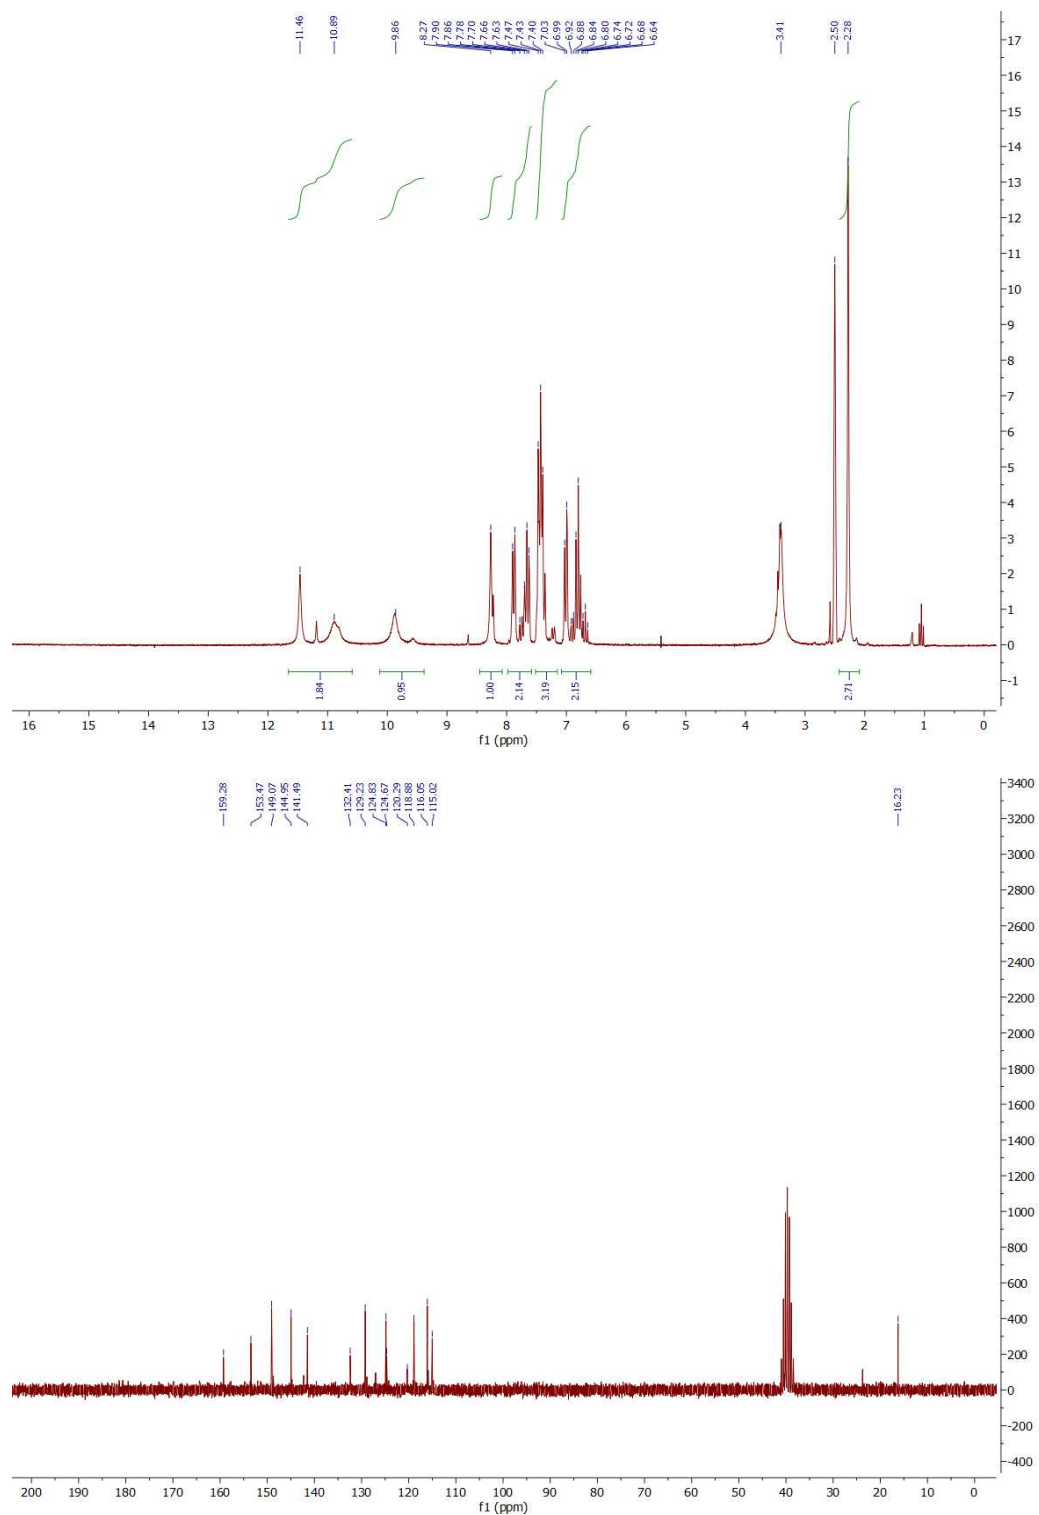

$^1\text{H}$  NMR and  $^{13}\text{C}$  NMR spectra of compound **3d**

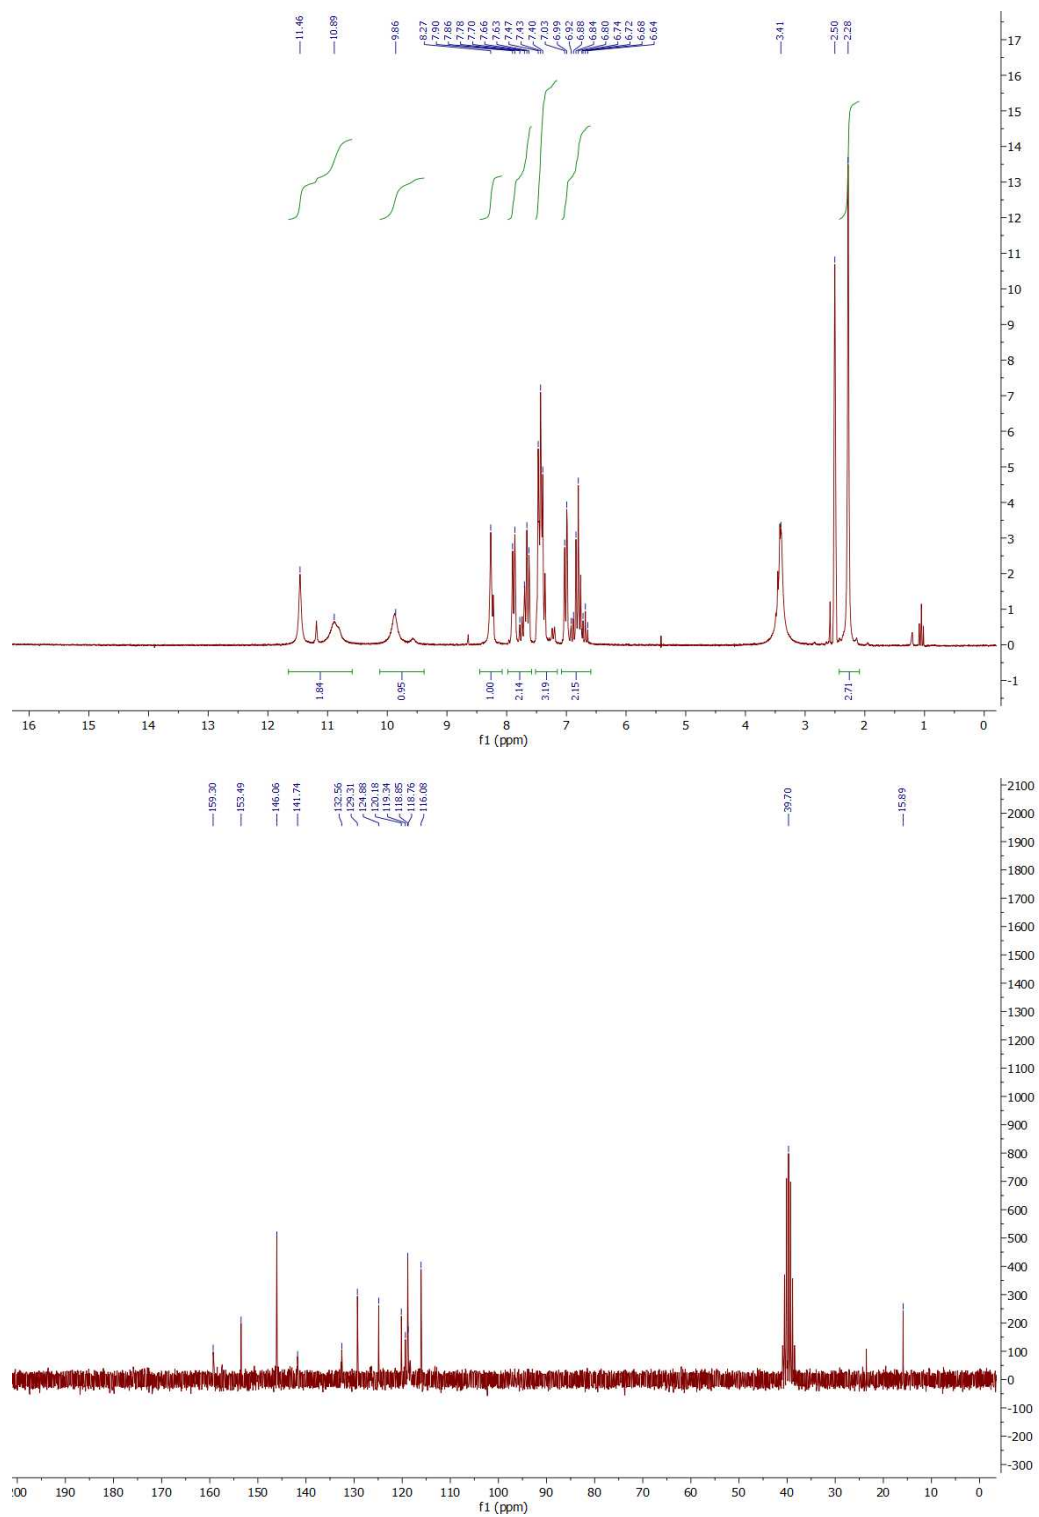

$^1\text{H}$  NMR and  $^{13}\text{C}$  NMR spectra of compound **3e**

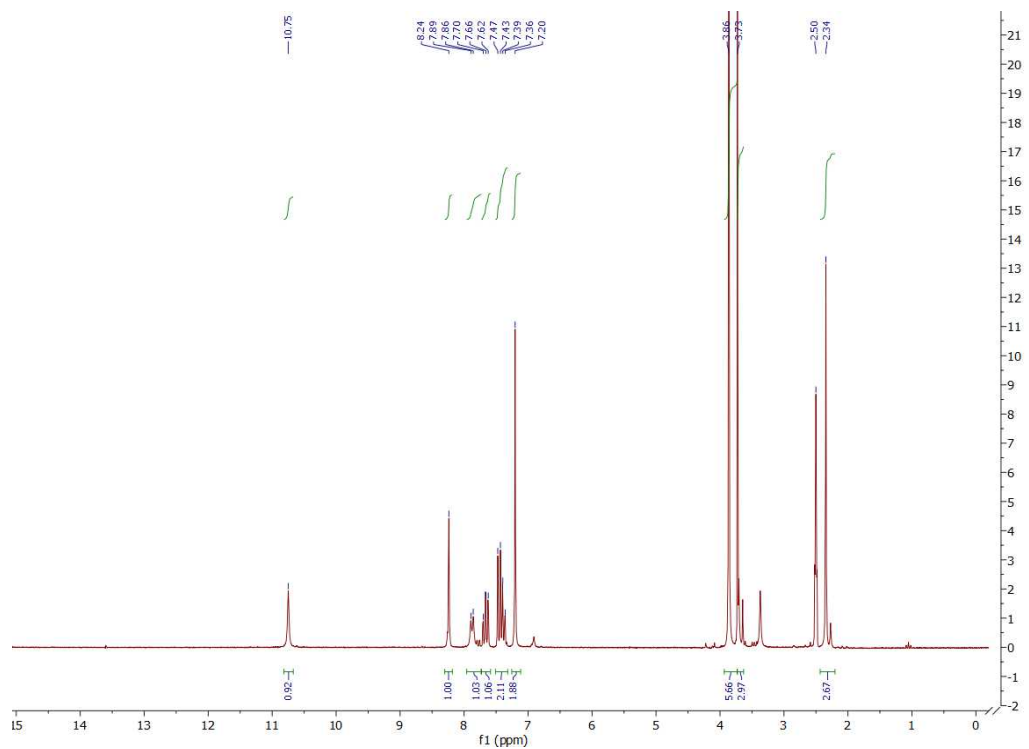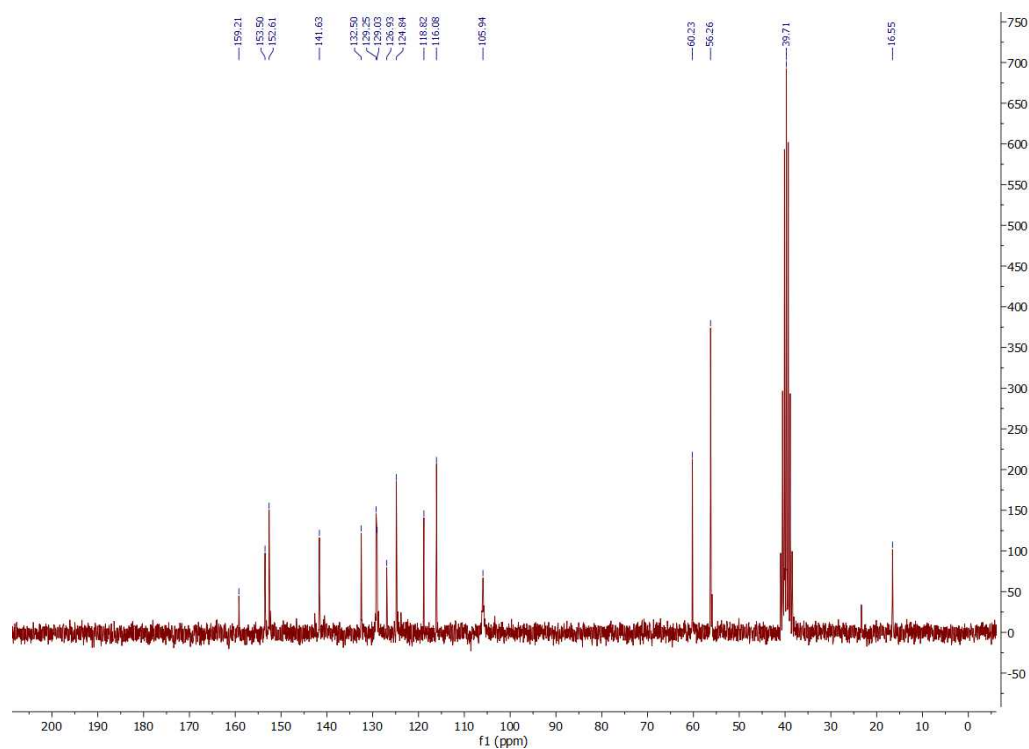

$^1\text{H}$  NMR and  $^{13}\text{C}$  NMR spectra of compound **3f**

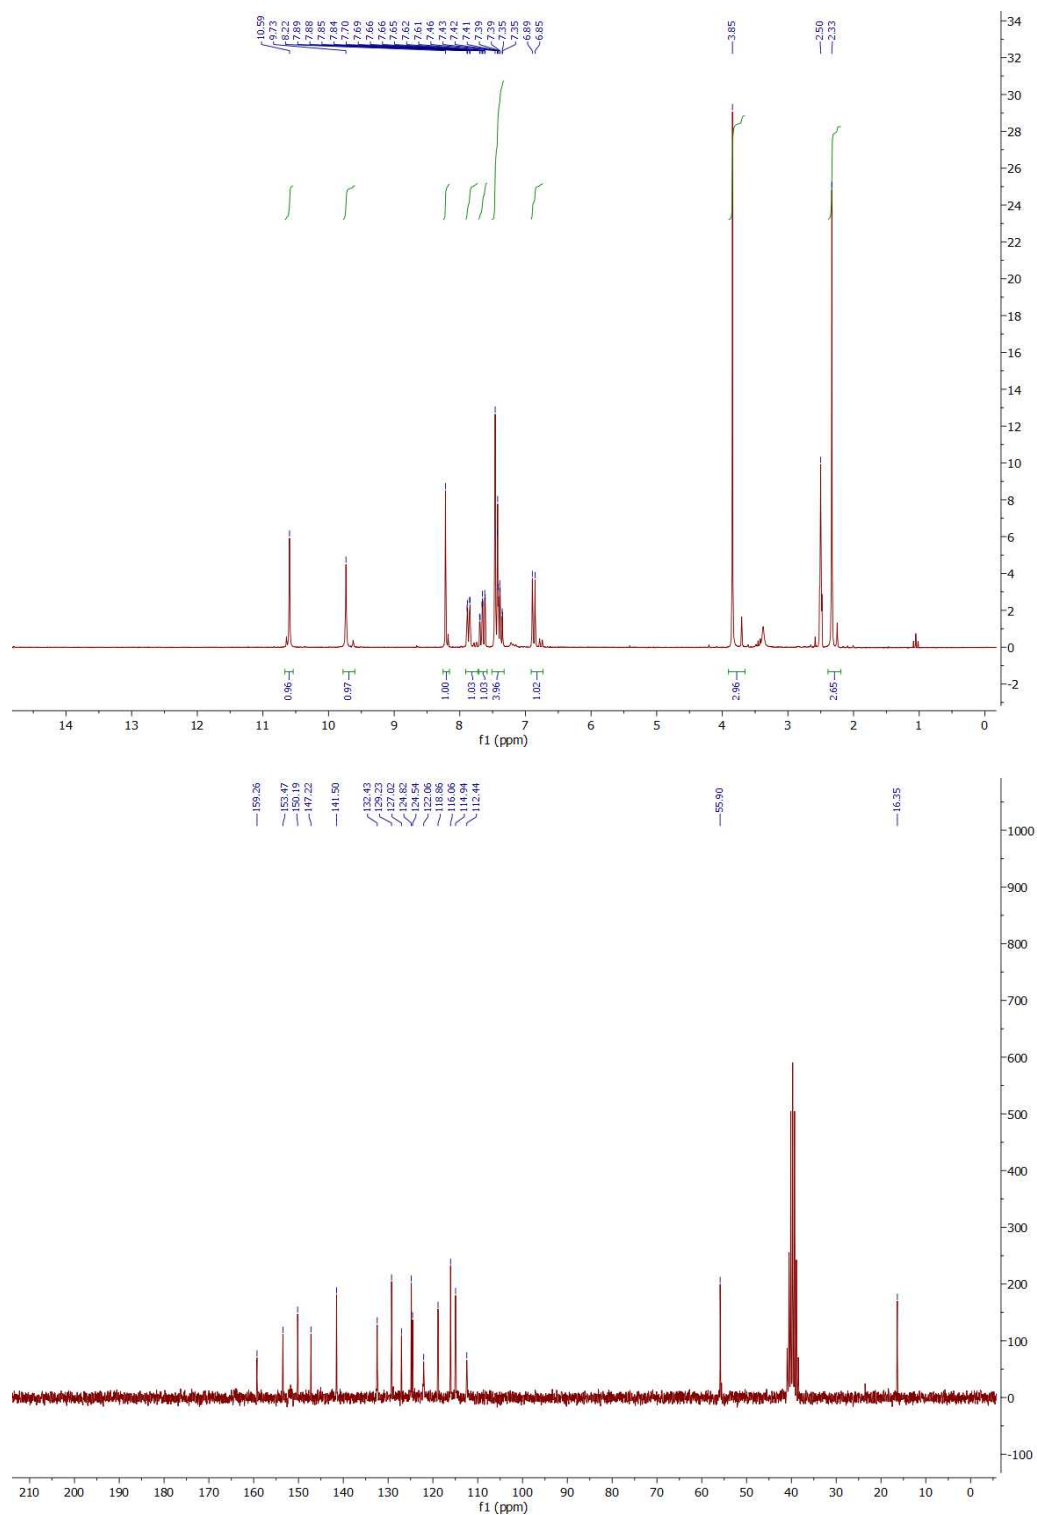

UV-Vis spectra of products **3a-f**

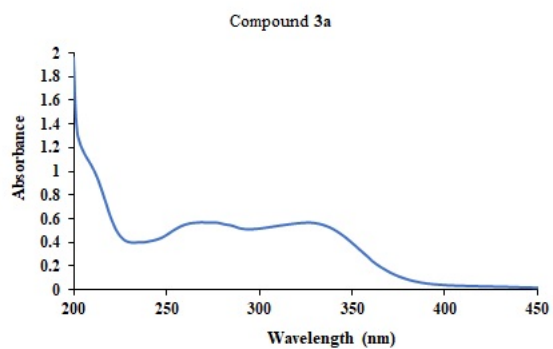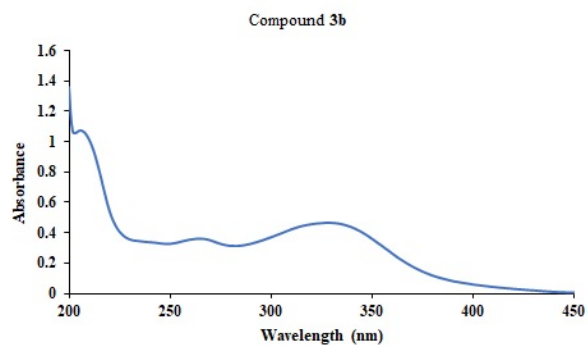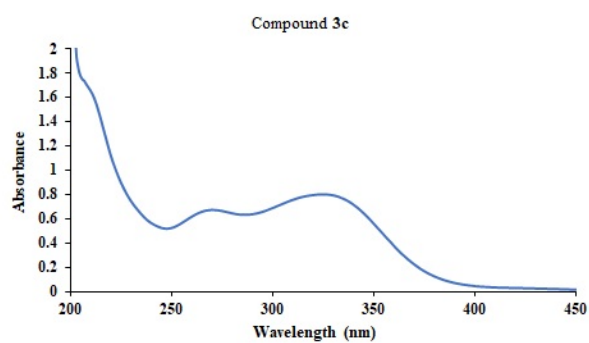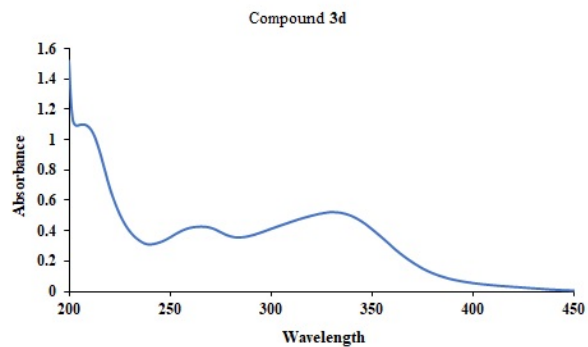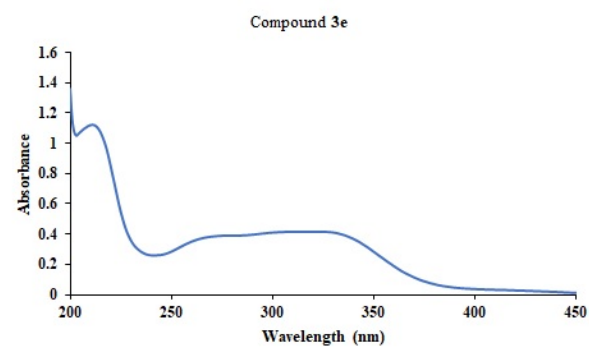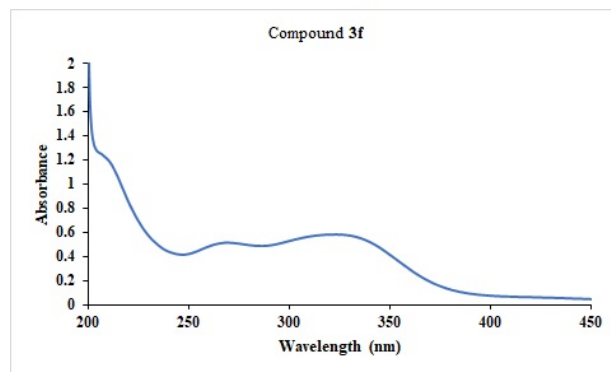



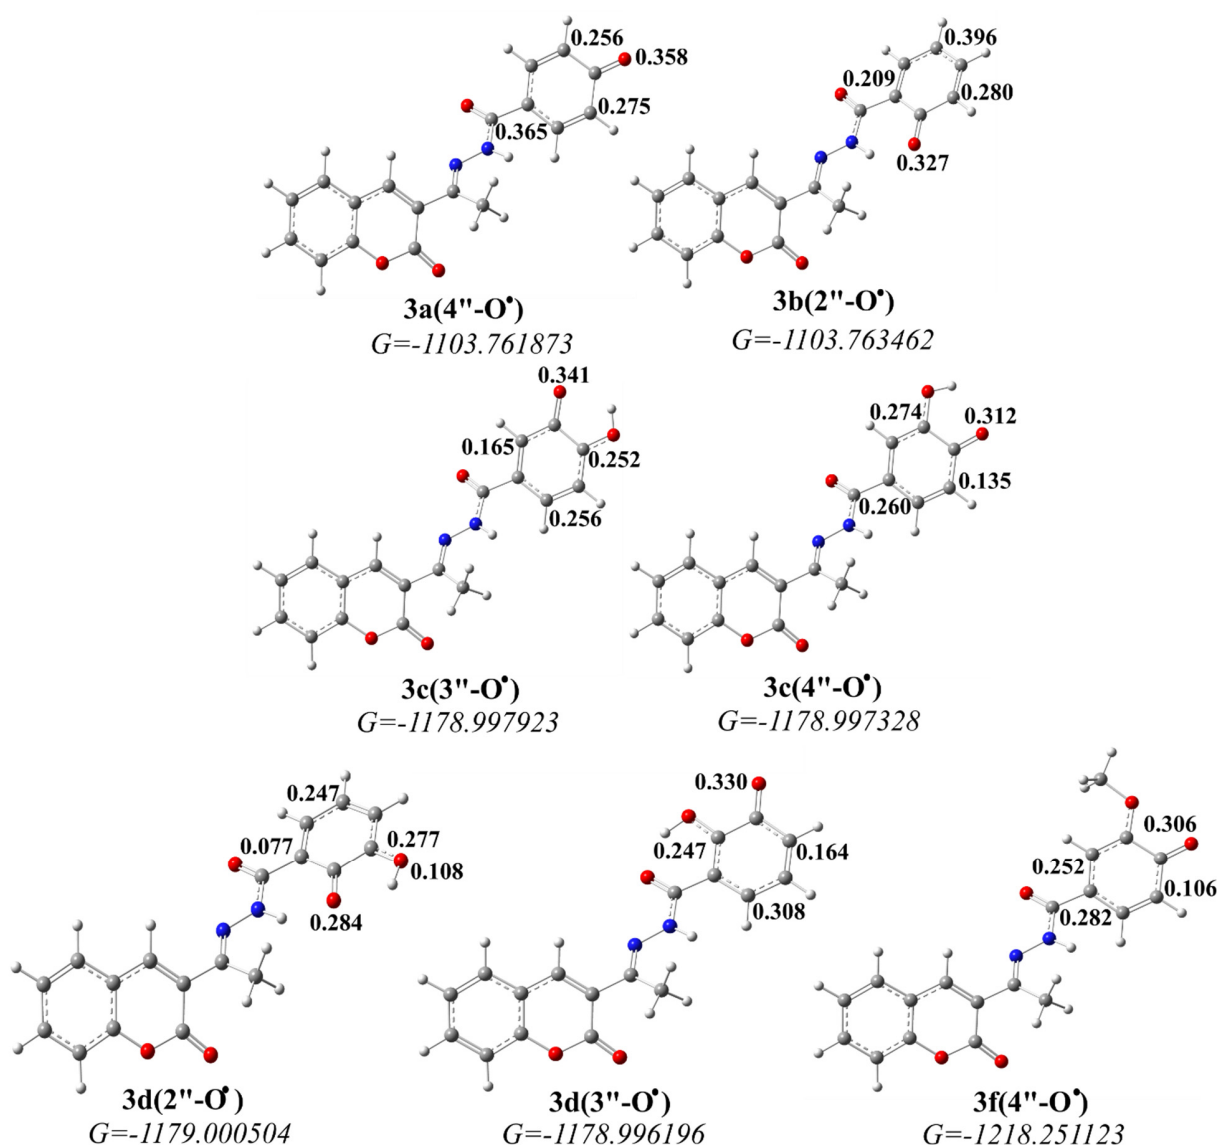

**Figure S1.** NBO spin distribution for formed O-centered radical species with the values of Gibbs free energy (a.u.)

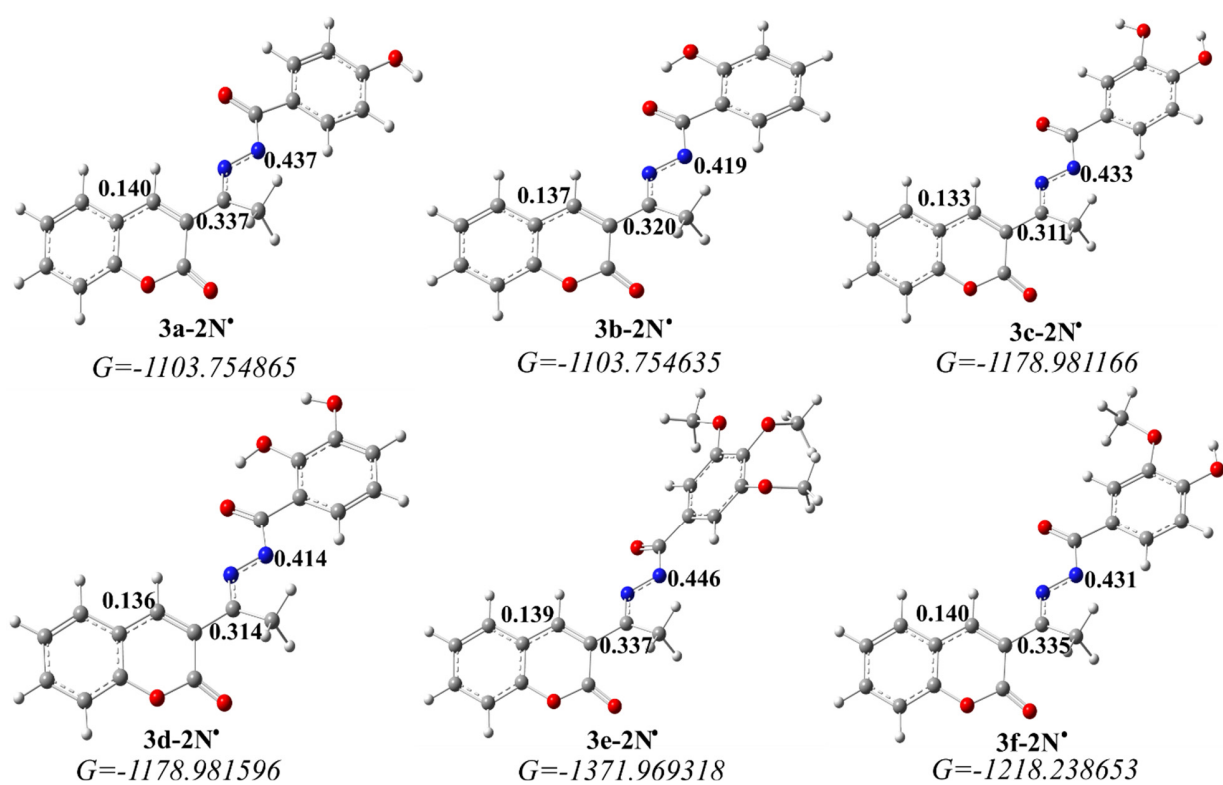

**Figure S2.** NBO spin distribution for formed N-centered radical species with the values of Gibbs free energy (a.u.)

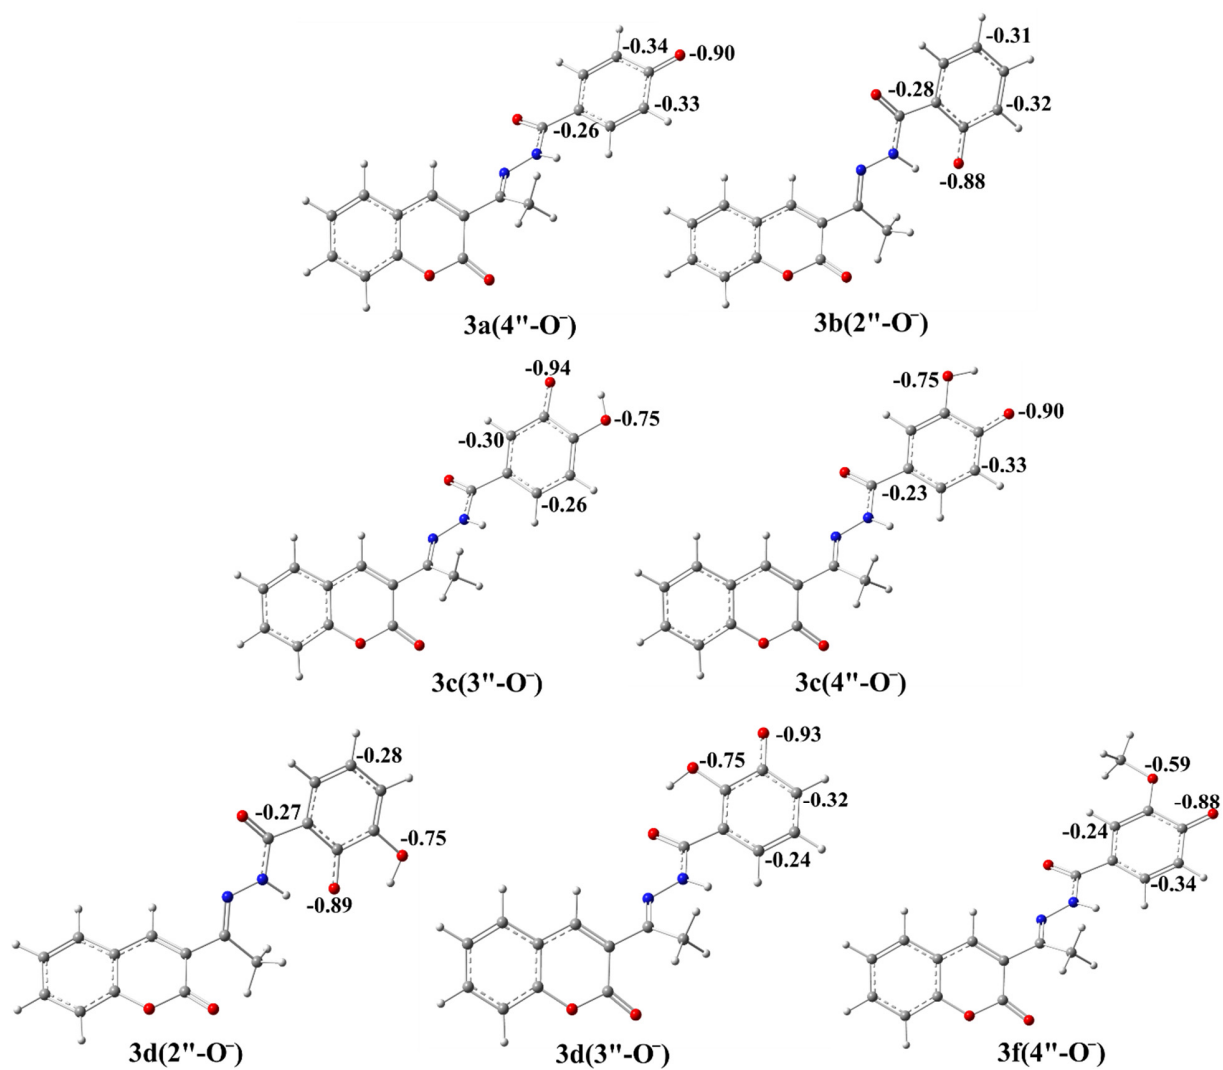

**Figure S3.** NBO charge distribution for formed O-centered anionic species

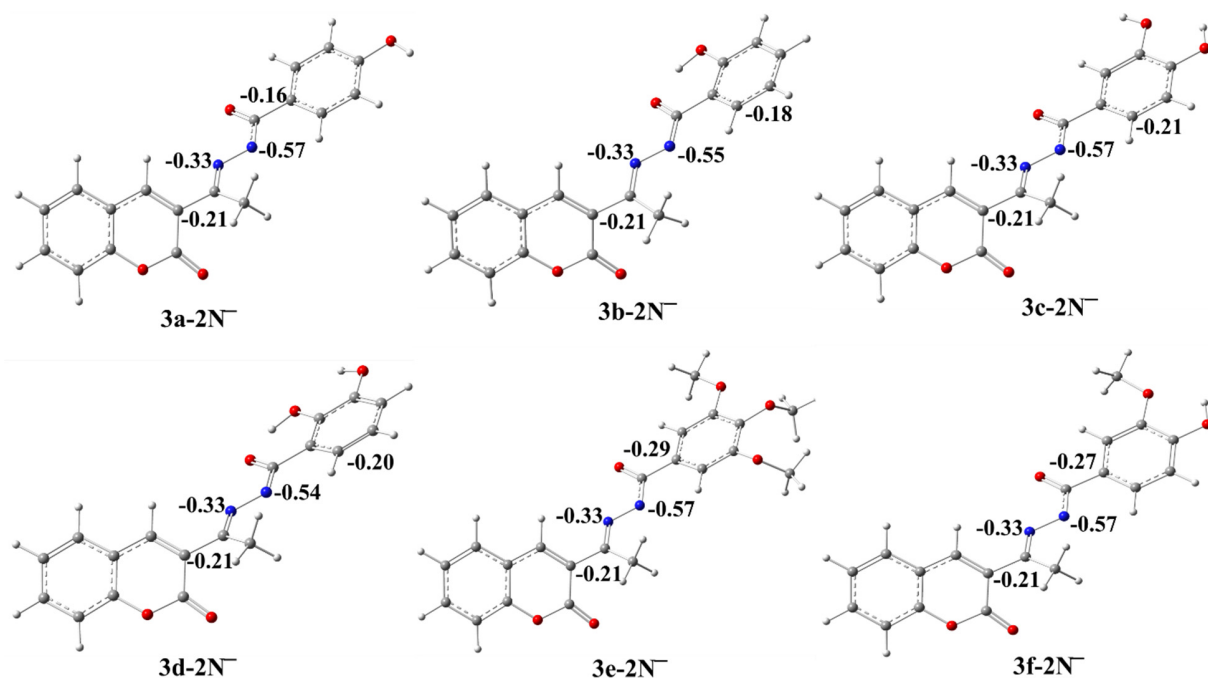

**Figure S4.** NBO charge distribution for formed N-centered anionic species

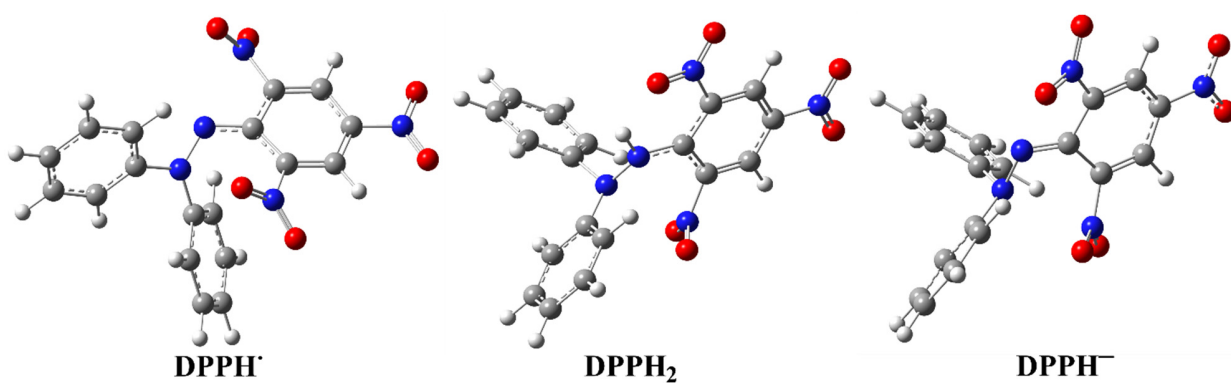

**Figure S5.** Optimized geometry of radical, neutral and anionic **DPPH** species at M06-2X/6-311++G(d,p) level of theory in methanol (SMD solvation model). Legend: gray-carbon atom, white-hydrogen atom, red-oxygen atom, blue-nitrogen atom.

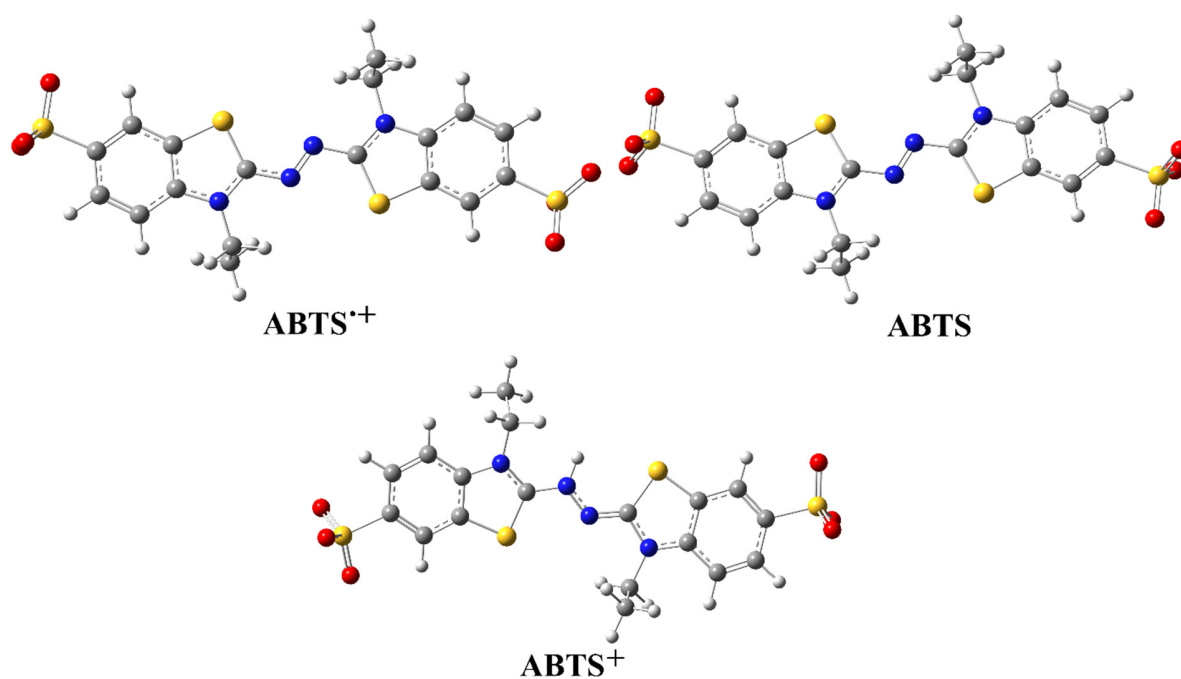

**Figure S6.** Optimized geometry of radical cation, neutral and cation **ABTS** species at M06-2X/6-311++G(d,p) level of theory in methanol (SMD solvation model). Legend: gray-carbon atom, white-hydrogen atom, red-oxygen atom, blue-nitrogen atom.

**Table S1.** DPPH scavenging activity of products **3c** and **3d**, as well as referent compounds at concentrations close to the IC<sub>50</sub> value.

| Compound         | DPPH scavenging ability (%) |             |           |             |           |           |
|------------------|-----------------------------|-------------|-----------|-------------|-----------|-----------|
|                  | 1 $\mu$ M                   | 1.5 $\mu$ M | 2 $\mu$ M | 2.5 $\mu$ M | 3 $\mu$ M | 5 $\mu$ M |
| <b>3c</b>        | 16.1                        | 39.3        | 42.6      | 64.3        | 72.1      | -         |
| <b>3d</b>        | -                           | 20.9        | 26.4      | 44.7        | 55.5      | 74.7      |
| <b>NDGA</b>      | 40.2                        | 42.2        | 56.3      | 59.9        | 79.52     | -         |
| <b>Quercetin</b> | 30.7                        | 45.1        | 53.9      | 60.9        | 77.6      | -         |

**Table S2.** ABTS radical cation scavenging activity of products **3c**, **3d**, and referent compound Trolox at concentrations close to the IC<sub>50</sub> value.

| Compound      | ABTS radical cation scavenging activity (%) |             |           |             |           |             |           |           |           |           |           |
|---------------|---------------------------------------------|-------------|-----------|-------------|-----------|-------------|-----------|-----------|-----------|-----------|-----------|
|               | 1 $\mu$ M                                   | 1.5 $\mu$ M | 2 $\mu$ M | 2.5 $\mu$ M | 3 $\mu$ M | 3.5 $\mu$ M | 4 $\mu$ M | 5 $\mu$ M | 6 $\mu$ M | 7 $\mu$ M | 8 $\mu$ M |
| <b>3c</b>     | 29.5                                        | 39.4        | 46.4      | 55.1        | 65.5      | 68.8        | -         | -         | -         | -         | -         |
| <b>3d</b>     | 19.6                                        | 27.7        | 34.5      | 43.6        | 52.3      | 55.4        | 65.3      | 77.9      | -         | -         | -         |
| <b>Trolox</b> | -                                           | -           | -         | -           | -         | -           | 38.8      | 48.8      | 55.3      | 64.8      | 71.9      |
